# Supplementary material
Source: PubMed Central journal article supplement (PMC6745244)
Supplement: NIHMS1535986-supplement-1.pdf [file NIHMS1535986-supplement-1.pdf]

**Supplementary Data:**

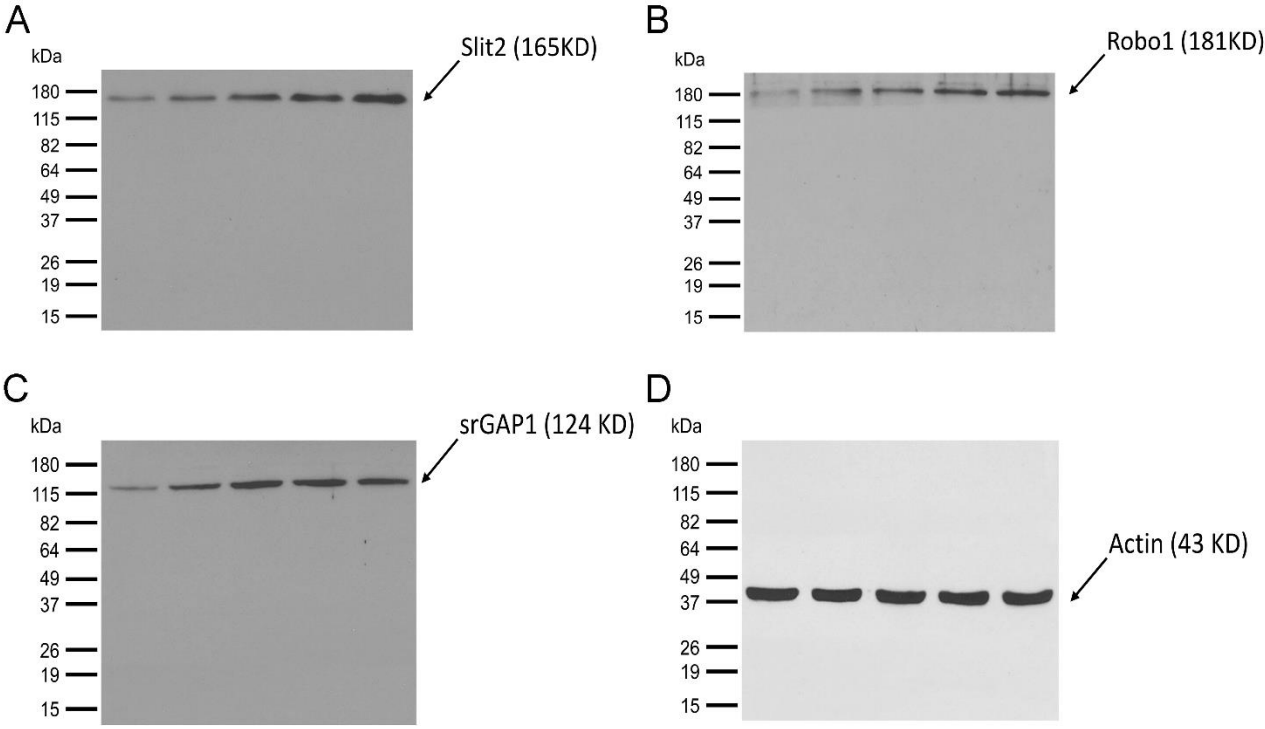

**Figure 1.** Representative pictures of Western blot data showing full band protein expression levels of Slit2/Robo1/srGAP1 at 6h,12h,24h,72h post HIE.

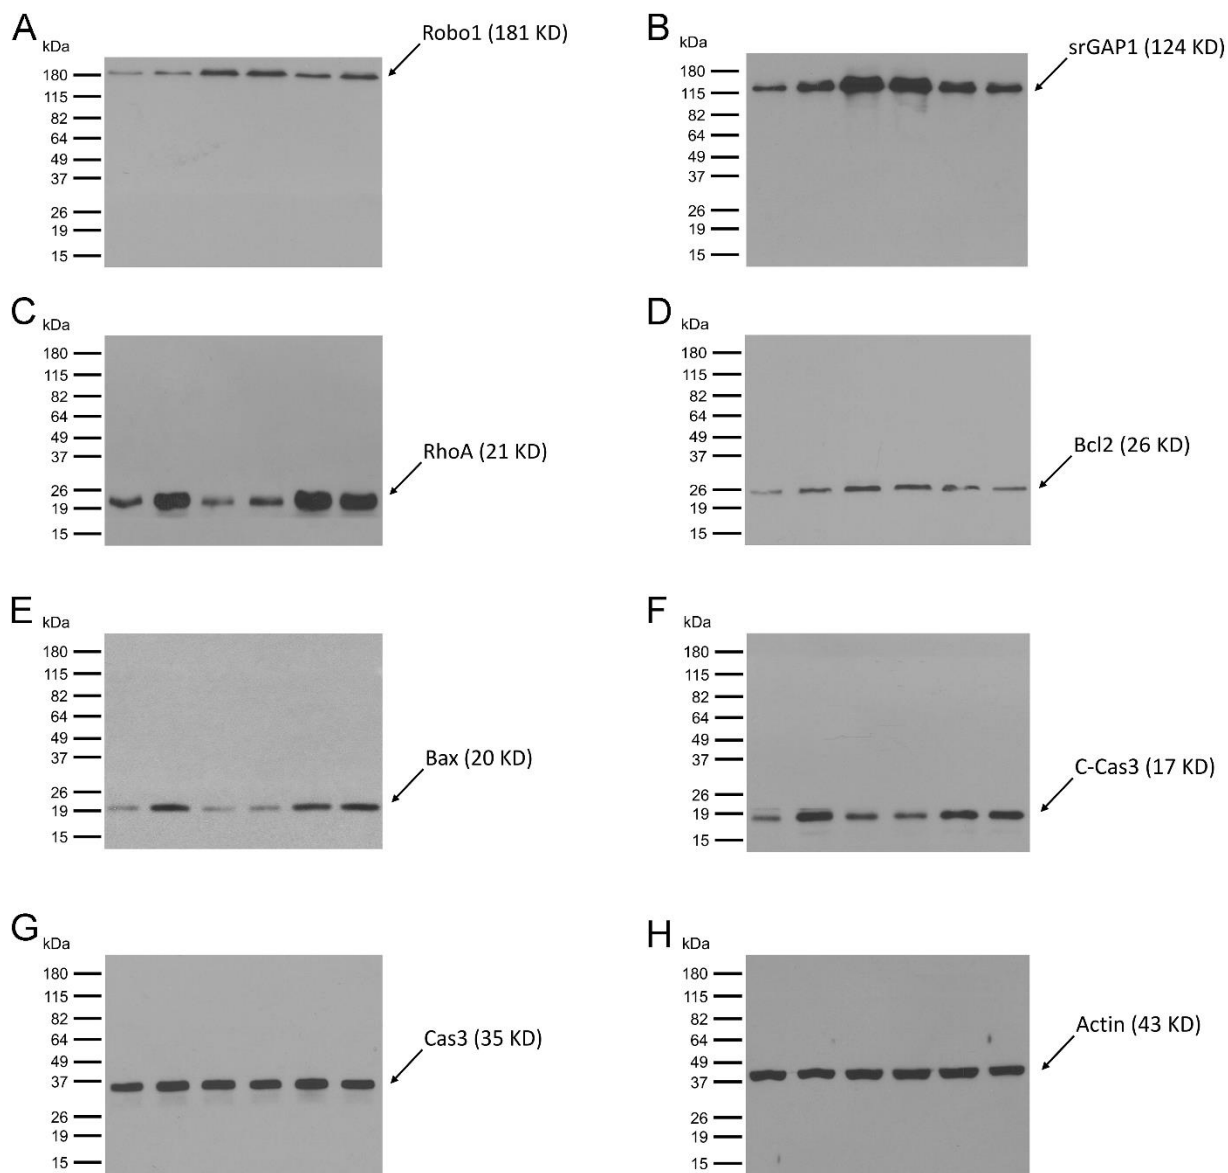

**Figure 2.** Representative pictures of western blot data showing full band of the expression levels of Slit2, Robo1, srGAP1, RhoA, Bcl2, Bax and cleaved caspase3/caspase3.
